# Supplementary material for: Spatial dispersion of lone electron pairs? – Experimental charge density of cubic arsenic(iii) oxide
Source: Royal Society of Chemistry journal article supplement (doi:10.1039/c4cp05656f), 2015-01-01
Supplement: c4cp05656f5.pdf [file c4cp05656f5.pdf]

# **Spatial Dispersion of Lone Electron Pairs? – Experimental Charge Density of Cubic Arsenic(III) Oxide Supporting Information**

Piotr A. Guńka,<sup>\*</sup> Zygmunt Gontarz, and Janusz Zachara

*Faculty of Chemistry, Warsaw University of Technology, Noakowskiego 3, 00-664 Warsaw,  
Poland*

E-mail: piogun@ch.pw.edu.pl

## **Measurement details**

Diffraction data were collected on Agilent Technologies Gemini A Ultra diffractometer equipped with an Oxford low temperature device (Oxford Cryosystems Cobra) at 100(2) K. The strategy involved 28  $\omega$  scans with a step of  $0.25^\circ$  at five different detector ( $2\theta$ ) positions and various  $\varphi$  angle values to increase reflections multiplicity (redundancy). Images with  $2\theta$  of 5, 30, 50, 68,  $118^\circ$  were exposed for 5, 5, 20, 40 and 40 s, respectively. The whole possible  $\omega$  range, i.e. not causing collisions, was scanned at every detector position. Such a strategy resulted

---

<sup>\*</sup>To whom correspondence should be addressed

Table S1: Refinement strategy of multipolar model for the experimental data

| Step | Refined parameters                                                                  | Comments                                                                                             |
|------|-------------------------------------------------------------------------------------|------------------------------------------------------------------------------------------------------|
| 1    | $kS$                                                                                |                                                                                                      |
| 2    | $kS + xyz$                                                                          |                                                                                                      |
| 3    | $kS + xyz + U_{ij}$                                                                 |                                                                                                      |
| 4a   | $kS + P_v$                                                                          | 10 cycles of block refinement                                                                        |
| 4b   | $kS + \kappa$                                                                       |                                                                                                      |
| 4    | $kS + P_v + \kappa$                                                                 |                                                                                                      |
| 5    | $kS + P_{lm}, l \leq 1$                                                             |                                                                                                      |
| 6    | $kS + P_{lm}, l \leq 2$                                                             |                                                                                                      |
| 7    | $kS + P_{lm}, l \leq 3$                                                             |                                                                                                      |
| 8    | $kS + P_{lm}, l \leq 4$                                                             |                                                                                                      |
| 9a   | $kS + xyz + U_{ij} + P_v + P_{lm}$                                                  | 50 cycles of block refinement                                                                        |
| 9b   | $kS + \kappa + \kappa'_{As}$                                                        |                                                                                                      |
| 9    | $kS + xyz + U_{ij} + P_v + P_{lm} + \kappa + \kappa'_{As}$                          |                                                                                                      |
| 10a  | $kS + xyz_{As}$                                                                     | 50 cycles of block refinement (high correlations between As position and Gram-Charlier coefficients) |
| 10b  | $kS + xyz_O + U_{ij} + C_{ijkAs} + D_{ijklAs}$                                      |                                                                                                      |
| 11a  | $kS + xyz + U_{ij} + P_v + P_{lm} + C_{ijkAs} + D_{ijklAs}$                         |                                                                                                      |
| 11b  | $kS + \kappa + \kappa'_{As}$                                                        |                                                                                                      |
| 11c  | $kS + xyz + U_{ij} + P_v + P_{lm} + C_{ijkAs} + D_{ijklAs} + \kappa + \kappa'_{As}$ |                                                                                                      |

in 11534 frames and multiplicity of 53.1 and 63.2 for resolution down to 0.36 and 0.40 Å, respectively. The data were corrected for absorption analytically in the CrysAlis<sup>PRO</sup> program and merged with SORTAV.

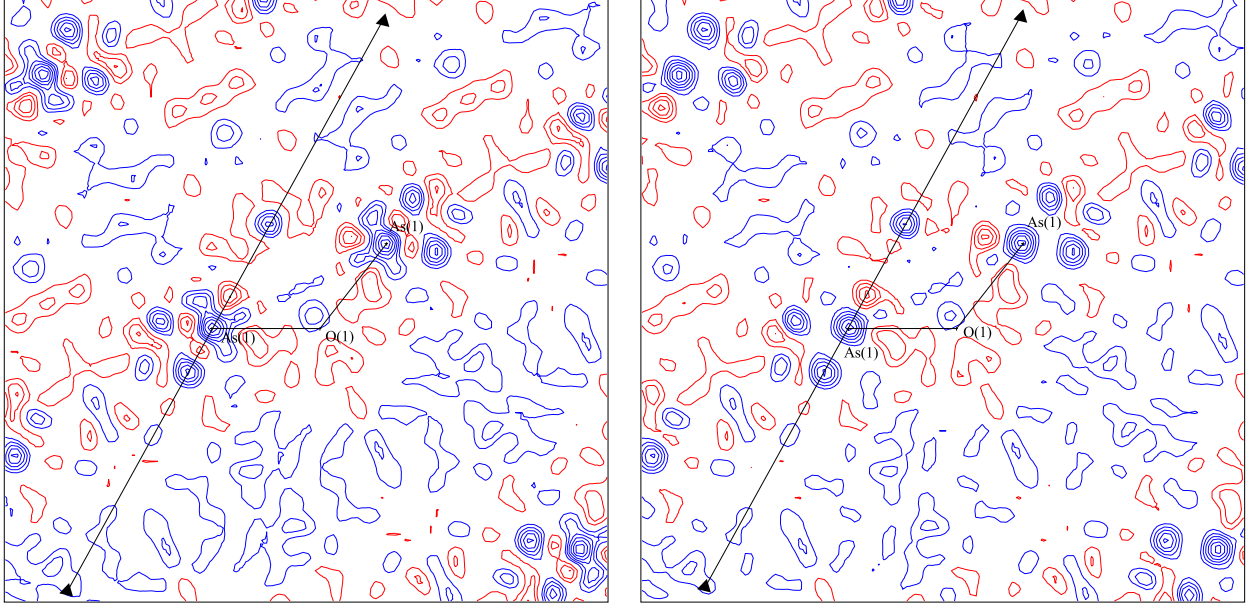

Figure S1: Residual density maps in the As–O–As plane after harmonic and anharmonic treatment of the thermal motion (left and right, respectively). Introduction of the Gram-Charlier coefficients up to the 4<sup>th</sup> order for arsenic atom reduced the Shashlik-like features around arsenic atom. Contours 0.1 eÅ<sup>-3</sup>; blue solid lines – positive, red solid lines – negative; the 3 symmetry axis along [111] is marked on the plots.

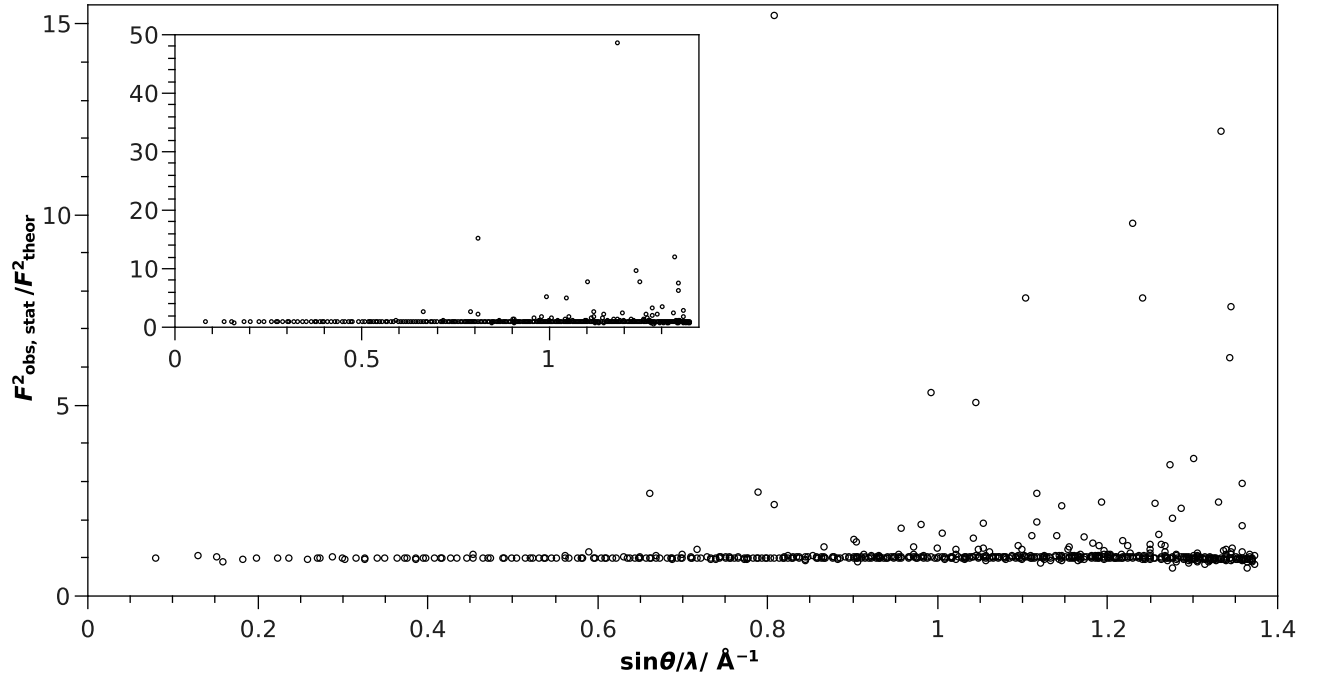

Figure S2: Plot of the  $F^2_{\text{obs, stat}}/F^2_{\text{theor}}$  ratio as a function of  $\sin \theta/\lambda$ . The same graph with a different scale on Y axis is presented in the inset.

Table S2: Highest peaks and deepest holes in the residual density after multipolar modelling of experimental structure factors.

| peak   |                      | $x$    | $y$    | $z$    | height |
|--------|----------------------|--------|--------|--------|--------|
| PK(1)  | is 0.03 Å from As(1) | 0,7728 | 0.7728 | 0.773  | 0.66   |
| PK(2)  | is 0.84 Å from As(1) | 0.7273 | 0.7273 | 0.7273 | 0.53   |
| PK(3)  | .....                | 0.125  | 0.125  | 0.125  | 0.53   |
| PK(4)  | is 0.89 Å from As(1) | 0.8163 | 0.7238 | 0.7238 | 0.49   |
| PK(5)  | is 0.25 Å from O(1)  | 0.875  | 0.8715 | 0.7222 | 0.23   |
| PK(6)  | .....                | 0.549  | 0.0034 | 0.0047 | 0.23   |
| PK(7)  | .....                | 0.625  | 0.001  | 0.125  | 0.22   |
| PK(8)  | .....                | 0.0955 | 0.0077 | 0.0077 | 0.21   |
| PK(9)  | .....                | 0.6662 | 0.0838 | 0.0838 | 0.20   |
| PK(10) | .....                | 0.9656 | 0.4649 | 0.1108 | 0.17   |
| HL(1)  | is 0.64 Å from As(1) | 0.8049 | 0.8049 | 0.8049 | −0.44  |
| HL(2)  | .....                | 0.814  | 0.043  | 0.0601 | −0.31  |
| HL(3)  | is 0.81 Å from As(1) | 0.809  | 0.8056 | 0.7188 | −0.29  |
| HL(4)  | .....                | 0.9102 | 0.0885 | 0.0885 | −0.24  |
| HL(5)  | .....                | 0.656  | 0.0118 | 0.0518 | −0.23  |
| HL(6)  | .....                | 0.1152 | 0.0576 | 0.0576 | −0.19  |
| HL(7)  | .....                | 0.125  | 0.4316 | 0.125  | −0.18  |
| HL(8)  | .....                | 0.9573 | 0.0004 | 0.0424 | −0.11  |
| HL(9)  | .....                | 0.9367 | 0.4738 | 0.0949 | −0.09  |
| HL(10) | .....                | 0.7893 | 0.0035 | 0.2893 | −0.08  |

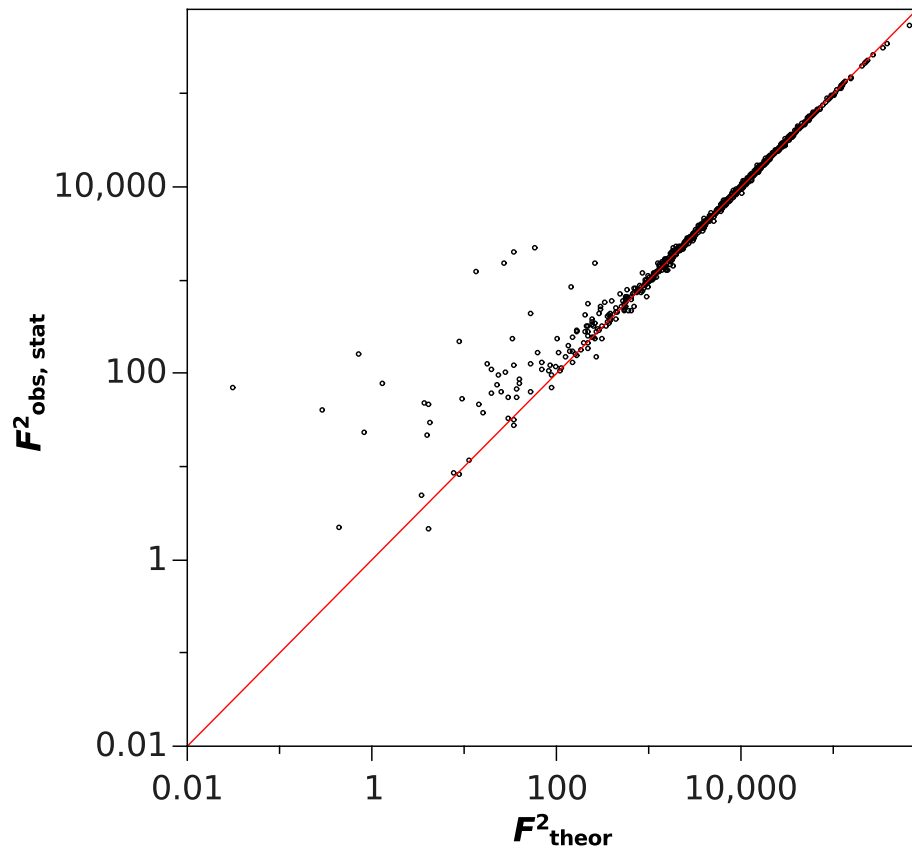

Figure S3: Comparison of  $F^2_{\text{obs, stat}}$  with  $F^2_{\text{theor}}$  depicting very good agreement for strong reflections and some discrepancies for the very weak ones.

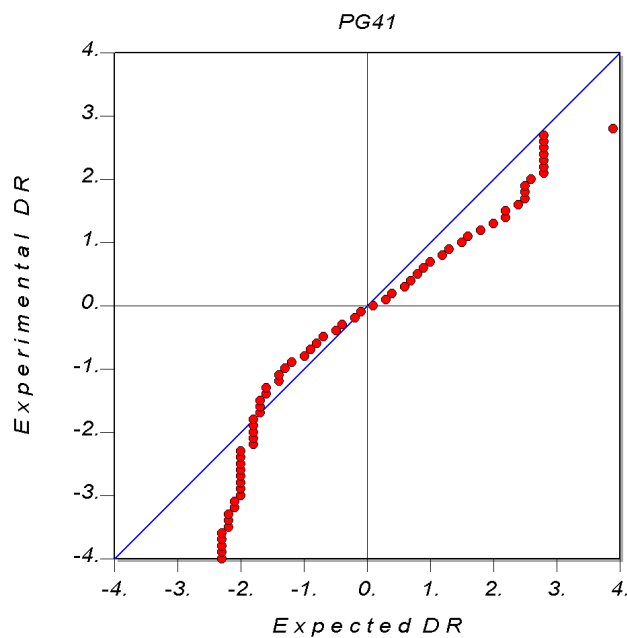

Figure S4: Normal probability plot for experimental structure factors after multipolar modelling (**exp\_MM**).

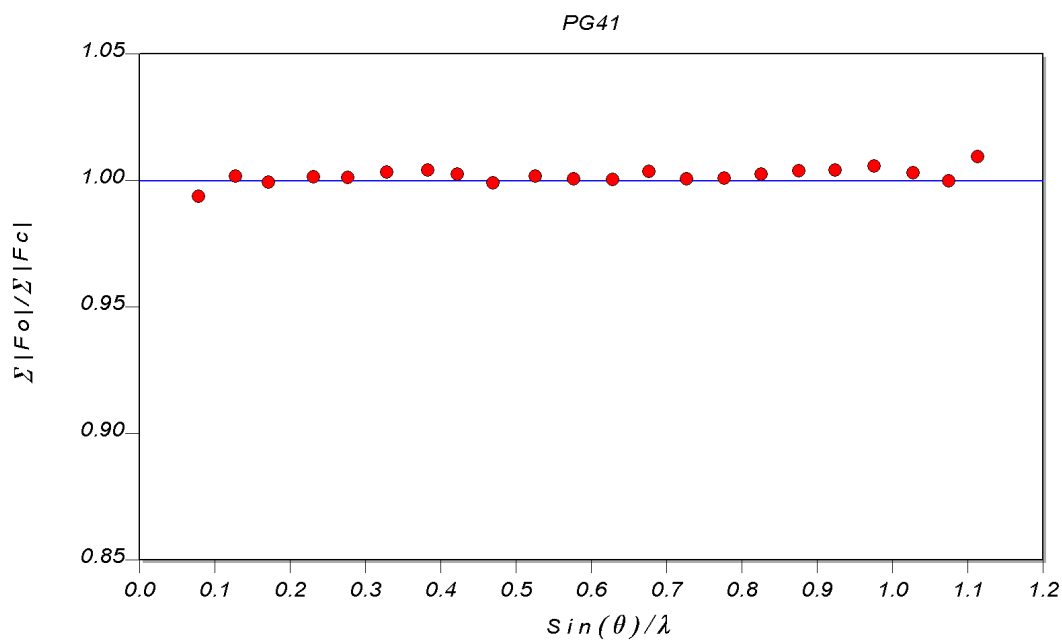

Figure S5: Scale factor variability ( $\Sigma |F_{\text{obs}}| / \Sigma |F_{\text{calc}}|$ ) as a function of  $\sin \theta / \lambda$  for the multipolar model (**exp\_MM**)
